# Supplementary material for: Biochar-Derived Persistent Free Radicals: A Plethora of Environmental Applications in a Light and Shadows Scenario
Source: MDPI journal article supplement (doi:10.3390/toxics12040245), 2024-03-27
Supplement: s1 [file s1]

# Biochar-Derived Persistent Free Radicals: A Plethora of Environmental Applications in a Lights and Shadows Scenario

Silvana Alfei<sup>1,\*</sup> and Omar Ginoble Pandoli<sup>1,2</sup>

<sup>1</sup>Department of Pharmacy (DIFAR), University of Genoa, Viale Cembrano, 4, 16148 Genoa, Italy, [omar.ginoble-pandoli@unige.it](mailto:omar.ginoble-pandoli@unige.it) or [omarpandoli@puc-rio.br](mailto:omarpandoli@puc-rio.br) (O.G.P.) (ORCID ID: 0000-0002-2220-7817)

<sup>2</sup>Department of Chemistry, Pontifical Catholic University, Rua Marquês de São Vicente, 225, Rio de Janeiro 22451-900, Brazil

\*Correspondence: [alfei@difar.unige.it](mailto:alfei@difar.unige.it) (S.A.) (ORCID ID: 0000-0002-4630-4371)

**Table S1.** Main sources and general application of BCs.

| Source biomass        | Ref. * | Applications                     | Refs. |
|-----------------------|--------|----------------------------------|-------|
| Crop residue          | [53]   | Carbon sequestration             | [67]  |
| Kitchen waste         | [54]   |                                  |       |
| Forestry              | [55]   | Soil amendment                   | [68]  |
| Agricultural waste    | [56]   |                                  |       |
| Sugar beet tailings   | [57]   | Composting                       | [69]  |
| Forest residues       | [58]   |                                  |       |
| Waste wood            | [59]   | Wastewater treatment             | [70]  |
| Bioenergy crops       | [60]   |                                  |       |
| Municipal solid waste | [61]   | Energy production/storage        | [71]  |
| Wheat straw           | [62]   | Adsorbing xenobiotics            | [72]  |
| Rice straw            | [63]   | Reducing greenhouse emission gas | [73]  |
| Food manure           | [64]   | Xenobiotics degradation          | [74]  |
| Animal manure         | [65]   | Catalysis                        | [75]  |
| Corn cob              | [66]   |                                  |       |

\* The references in the Table correspond to those reported in the main text.

**Table S2.** Fast and slow pyrolysis details.

|                     | Fast Pyrolysis                                                                                                    | Slow Pyrolysis                                                     | Ref. |
|---------------------|-------------------------------------------------------------------------------------------------------------------|--------------------------------------------------------------------|------|
| Target Product      | Bio-oils                                                                                                          | Biochar                                                            |      |
| Reactors            | Bubbling fluidized bed<br>Ablative reactor<br>Rotary cone                                                         | Fixed bed pyrolysis reactor<br>Auger pyrolysis reactor             |      |
| Warming rate        | 10-10000°C/min                                                                                                    | 0.1-10°C/min                                                       |      |
| RT at ↑ temperature | 0.5-2 seconds                                                                                                     | > 1 hour                                                           |      |
| Aeration            | Oxygen-free                                                                                                       | Oxygen-free or limited                                             |      |
| Advantages          | ↑ Yield of bio-oil                                                                                                | ↑ Yield of BC<br>Accepted a wide range of particle size            | [97] |
| Disadvantages       | ↓ BC yield<br>Required fine particles of biomass feed (1-2 mm)<br>Prefer biomass with low moisture content (<10%) | Further treatment of gases is needed due to high CO concentrations |      |
| Applications        | ↑ Potential for energy applications                                                                               | Improvement of soil quality                                        |      |

\* The references in the Table correspond to those reported in the main text. RT = Residence time; ↑ = high, higher; ↓ = low, lower.



**Table S3.** Techniques typically used to characterize BCs in terms of their physicochemical, surface, and structural characterization.

| Biochar characterization techniques |                    |                          |                 |                                       |           |
|-------------------------------------|--------------------|--------------------------|-----------------|---------------------------------------|-----------|
| Physicochemical Characterization    |                    | Surface Characterization |                 | Structural/Molecular Characterization |           |
| Chemical                            | Physical           | Investigation            | Technique       | Investigation                         | Technique |
| pH                                  | Surface area (BET) | Morphology               | SEM             | Thermal behavior                      | TGA       |
| Cation exchange capacity (CEC)      | Size (nm) (TEM)    | Functional groups        | FTIR/Raman      | Structural arrangements               | XRD       |
| Electrical conductivity             | Bulk density       | Surface elements         | SEM, EDXS, XFR  | Aromaticity                           | NMR/Raman |
|                                     | Pore size (BET)    | Surface oxygen           | Boehm titration | Free radicals                         | EPR/ESR   |

SEM = Scanning Electron Microscopy; TEM = transmission electron microscopy analysis; EDXS = Energy-Dispersive X-ray Spectroscopy (EDXS); XFR = X-ray Fluorescence spectroscopy; FTIR = Fourier Transform Infrared Spectrometer; TGA = thermos-gravimetric analysis; XRD = X-Ray Diffraction; BET = Brunauer-Emmett-Teller (BET); NMR = Nuclear Magnetic Resonance (NMR); Raman = Raman Spectroscopy; Cation Exchange Capacity (CEC); EPR = Electron Paramagnetic Resonance; ESR = Electron Spin Resonance (ESR) spectroscopy.

**Table S4.** Properties of BCs produced from various feedstocks at various production temperatures.

The table has been constructed on a literature example [99].

| Feedstock       | Pyrolysis temp. | Yield | Ash  | pH   | C     | H    | O     | N    | Surface area                      |
|-----------------|-----------------|-------|------|------|-------|------|-------|------|-----------------------------------|
|                 | (°C)            | (%)   | (%)  |      | (%)   | (%)  | (%)   | (%)  | (m <sup>2</sup> g <sup>-1</sup> ) |
| Canola straw    | 400             | 27.4  | –    | –    | 45.7  | –    | –     | 0.19 | –                                 |
| Corn cobs       | 500             | 18.9  | 13.3 | 7.8  | 77.6  | 3.05 | 5.11  | 0.85 | 0.0                               |
| Corn stover     | 450             | 15.0  | 58.0 | –    | 33.2  | 1.40 | 8.60  | 0.81 | 12.0                              |
| Corn stover     | 500             | 17.0  | 32.8 | 7.2  | 57.3  | 2.86 | 5.45  | 1.47 | 3.1                               |
| Cottonseed hull | 200             | 83.4  | 3.1  | –    | 51.9  | 6.00 | 40.5  | 0.60 | –                                 |
| Cottonseed hull | 800             | 24.2  | 9.2  | –    | 90.0  | 0.60 | 7.00  | 1.90 | 322.0                             |
| Fescue straw    | 100             | 99.9  | 6.9  | –    | 48.6  | 7.25 | 44.1  | 0.64 | 1.8                               |
| Fescue straw    | 700             | 28.8  | 19.3 | –    | 94.2  | 1.53 | 3.60  | 0.70 | 139.0                             |
| Oak bark        | 450             | –     | 11.1 | –    | 71.2  | 2.63 | 12.9  | 0.46 | 1.9                               |
| Oakwood         | 400–450         | –     | 2.9  | –    | 82.8  | 2.70 | 8.05  | 0.31 | 2.7                               |
| Orange peel     | 150             | 82.4  | 0.5  | –    | 50.6  | 6.20 | 41.0  | 1.75 | 22.8                              |
| Orange peel     | 700             | 22.2  | 2.8  | –    | 71.6  | 1.76 | 22.2  | 1.72 | 201.0                             |
| Peanut shell    | 300             | 36.9  | 1.2  | 7.8  | 68.27 | 3.85 | 25.89 | 1.91 | 3.1                               |
| Peanut shell    | 700             | 21.9  | 8.9  | 10.6 | 83.76 | 1.75 | 13.34 | 1.14 | 448.2                             |
| Peanut straw    | 400             | 28.2  | –    | –    | 42.90 | –    | –     | 1.50 | –                                 |
| Pine needles    | 100             | 91.2  | 1.1  | –    | 50.87 | 6.15 | 42.27 | 0.71 | 0.7                               |
| Pine needles    | 700             | 14.0  | 2.2  | –    | 86.51 | 1.28 | 11.08 | 1.13 | 490.8                             |
| Pine shaving    | 100             | 99.8  | 1.2  | –    | 50.60 | 6.68 | 42.70 | 0.05 | 1.6                               |
| Pine shaving    | 700             | 22.0  | 1.7  | –    | 92.30 | 1.62 | 6.00  | 0.08 | 347.0                             |
| Pinewood        | 700             | –     | 38.8 | 6.6  | 95.30 | 0.82 | 3.76  | 0.12 | 29.0                              |
| Poplar wood     | 400             | 32.0  | 3.5  | 9.0  | 67.30 | 4.42 | –     | 0.78 | 3.0                               |
| Rice husk       | 500             | –     | 42.2 | –    | 42.10 | 2.20 | 12.10 | 0.50 | 34.4                              |
| Saw dust        | 450             | –     | 1.1  | 5.9  | 72.00 | 3.50 | 24.41 | 0.08 | –                                 |
| Saw dust        | 550             | –     | 2.8  | 12.1 | 85.00 | 1.00 | 13.68 | 0.30 | –                                 |



---

|                |     |       |      |      |       |      |       |      |       |
|----------------|-----|-------|------|------|-------|------|-------|------|-------|
| Soybean stover | 300 | 37.0  | 10.4 | 7.3  | 68.81 | 4.29 | 24.99 | 1.88 | 5.6   |
| Soybean stover | 700 | 21.6  | 17.2 | 11.3 | 81.98 | 1.27 | 15.45 | 1.30 | 420.3 |
| Soybean straw  | 400 | 24.7  | –    | –    | 44.10 | –    | –     | 2.38 | –     |
| Spruce wood    | 400 | 36.0  | 1.9  | 6.9  | 63.50 | 5.48 | –     | 1.02 | 1.8   |
| Spruce wood    | 525 | –     | 4.7  | 8.6  | 78.30 | 3.04 | –     | 1.17 | 40.4  |
| Wheat straw    | 400 | 34.0  | 9.7  | 9.1  | 65.70 | 4.05 | –     | 1.05 | 4.8   |
| Wheat straw    | 525 | –     | 12.7 | 9.2  | 74.40 | 2.83 | –     | 1.04 | 14.2  |
| Chicken litter | 620 | 43-49 | 53.2 | -    | 41.50 | 1.20 | 0.70  | 2.77 | -     |
| Poultry litter | 350 | 54.3  | 30.7 | 8.7  | 51.07 | 3.79 | 15.63 | 4.45 | 3.9   |
| Poultry litter | 700 | 36.7  | 46.2 | 10.3 | 45.91 | 1.98 | 10.53 | 2.07 | 50.9  |
| Tire rubber    | 200 | 93.5  | 15.0 | -    | 74.70 | 6.38 | 3.92  | -    | -     |
| Tire rubber    | 800 | 43.0  | 10.5 | -    | 86.0  | 0.87 | 2.16  | 0.47 | 50.0  |

---

**Disclaimer/Publisher's Note:** The statements, opinions and data contained in all publications are solely those of the individual author(s) and contributor(s) and not of MDPI and/or the editor(s). MDPI and/or the editor(s) disclaim responsibility for any injury to people or property resulting from any ideas, methods, instructions or products referred to in the content.
